# Supplementary material
Source: Research Square preprint supplement (doi:10.21203/rs.3.rs-9770222/v1)
Supplement: Supplementary file 1 [file c0f60e57ad64c710d481f68a.docx]

**APPENDIX:**

**INTERVIEW QUESTIONS LIST**

**Study Title**: A Multiple Case Study of University-Industry Engagement in Jiangxi's Private Higher Education Sector

Before we begin, I would like to take a moment to introduce myself and the project. My name is Liu Yaoguang, and I am conducting a study on how private universities in Jiangxi Province engage with enterprises through the Fang Qi Tuo Gang initiative, specifically examining the practices and challenges involved in building effective university-industry partnerships. The purpose of this interview is to hear about your direct experiences and perspectives, which will help us understand what works well and where improvements might be made. I want to be very clear that your participation in this study is entirely voluntary; you are free to decline to answer any question, and you may withdraw from the interview at any time without providing a reason and without any consequence. If you are comfortable proceeding, I would like to request your consent to participate in the study and, with your permission, to audio-record our conversation to ensure the accuracy of my notes. All information you share will be treated with the strictest confidence. Interview recordings will be transcribed and all identifying details, including your name, job title, and the name of your institution or company, will be removed or replaced with general descriptors. The data will be stored securely in password-protected files accessible only to the research team, and it will be used solely for the purposes of this academic study. In any published reports or articles, neither you nor your institution will be identifiable in any way. Do you have any questions before we get started?

A3. Participant Background Information

1. Name (for internal tracking only; anonymized in analysis)

2. Institution/Enterprise

3. Position/Job Title

4. Years in current position

5. Role in university-industry engagement activities

Part B: University Interview Protocol

Target Respondents:

Vice President in charge of student affairs or employment

Director of Career Services/Employment Office

Dean or Party Secretary of a secondary college

Frontline career counselor or employment guidance teacher

Estimated Duration: 45-60 minutes per interview

B1. Warm-Up and Context Setting

1. Could you please briefly describe your role and responsibilities in relation to university-industry engagement and graduate employment?

2. In your understanding, what are the primary goals of the FQTG initiative at your university?

B2. Dimension 1: Regional Alignment (定位)

1. How does your university determine which enterprises to visit? What criteria or principles guide this selection process?

2. To what extent are the targeted enterprises aligned with the industrial structure and economic development priorities of Jiangxi Province or Nanchang City?

3. Are there any industries or sectors that your university deliberately prioritizes or avoids in these visits? Why?

4. [Probe] Could you give a specific example of an enterprise visit that was particularly well-aligned with your university's regional mission?

B3. Dimension 2: Student-Centered Targeting (选择)

1. Before arranging enterprise visits, does your university collect or analyze data on students' employment preferences, geographical mobility intentions, or target industries?

2. How, if at all, do students' actual job search behaviors and employment outcomes inform the selection of enterprises for future visits?

3. Have you ever decided not to visit a particular enterprise, even if it was prestigious, because it did not match your graduates' profiles or preferences?

4. [Probe] What kinds of student data, if any, would you find most useful for making more informed enterprise selection decisions?

B4. Dimension 3: Stratified On-Site Inquiry (调研)

1. When you visit an enterprise, who do you typically meet with? (e.g., senior executives, HR managers, technical supervisors, frontline employees)

2. What kinds of questions do you ask during these visits? Do your questions differ depending on whom you are speaking with?

3. Do you typically tour the actual work environment, such as production lines, workshops, or offices, or do visits primarily consist of conference room discussions?

4. [Probe] Could you walk me through the structure of a typical enterprise visit from start to finish?

5. Have you ever conducted in-depth interviews with frontline practitioners to understand the specific skills and competencies required for entry-level positions?

B5. Dimension 4: Closed-Loop Feedback for Curricular Reform (反馈)

1. After an enterprise visit, how is the information gathered documented, shared, and disseminated within the university?

2. Does the information from enterprise visits ever reach academic departments, curriculum committees, or faculty members responsible for program design?

3. Can you identify any concrete changes to academic programs, course content, or teaching methods that were directly influenced by insights gained from FQTG visits?

4. [Probe] What are the main obstacles that prevent feedback from enterprise visits from being translated into curricular improvements?

5. If you could redesign the feedback mechanism, what would it look like?

B6. Dimension 5: Reciprocal Benefit (共赢)

1. Beyond graduate placement, what value does your university offer to the enterprises you visit? What can you do for them?

2. Have any enterprises expressed specific talent-related pain points, such as skill gaps, high turnover, or difficulty recruiting for niche positions, that your university has been able to address?

3. Could you describe a partnership that evolved from an initial FQTG visit into a deeper, more sustained collaboration? What made that evolution possible?

4. [Probe] Have you ever co-designed a talent development program (e.g., customized training, order-form classes, joint projects) with an enterprise following a visit?

B7. Dimension 6: Institutionalization and Sustainability (机制)

1. After an initial visit, what mechanisms are in place to maintain ongoing communication with the enterprise? Who is responsible for follow-up?

2. How does your university evaluate the effectiveness of FQTG activities? What metrics or indicators are used?

3. Are there any formal incentives, for faculty, staff, or departments, to conduct high-quality enterprise engagement? Are there any consequences for poor-quality engagement?

4. [Probe] From your perspective, what would it take to make FQTG a sustained, institutionalized practice rather than an episodic campaign?

B8. Overall Assessment and Reflection

1. In your honest assessment, what is the single greatest challenge or barrier to effective FQTG implementation at your university?

2. Looking ahead three to five years, what changes would you most like to see in how your university approaches enterprise engagement?

3. Is there anything else you would like to add that we have not covered?

Part C: Enterprise Interview Protocol

Target Respondents:

HR Director or Recruitment Manager

Department Manager or Technical Supervisor involved in graduate hiring

Project Manager overseeing university collaboration

Estimated Duration: 30-45 minutes per interview

C1. Warm-Up and Context Setting

1. Could you briefly describe your role and your involvement in hiring and working with university graduates?

2. How long has your company been collaborating with [University Name]? How did the relationship begin?

C2. Experience of University Visits

1. Have you hosted visits from [University Name] as part of their FQTG initiative? If so, could you describe what typically happens during such a visit?

2. During these visits, what kinds of questions did university representatives ask? Did you feel they genuinely understood your talent needs?

3. Did university representatives visit your actual work sites, such as production floors, design studios, or operational departments, or did meetings primarily take place in conference rooms?

4. [Probe] From your perspective, what distinguishes a meaningful university visit from a perfunctory one?

C3. Talent Needs and Skill Gaps

1. When you hire graduates from [University Name], what strengths do you typically observe? What skills or competencies do you find are lacking or underdeveloped?

2. Have you ever communicated specific skill gaps or training needs to the university? If so, what was the response?

3. [Probe] What specific skills or competencies would you most like to see graduates develop before entering the workforce?

C4. Feedback and Curricular Relevance

1. Has [University Name] ever solicited your input on curriculum design, program development, or teaching content?

2. In your observation, have there been any noticeable changes in the quality or preparedness of graduates from [University Name] over the past few years?

3. [Probe] If you could recommend one change to the university's talent development approach, what would it be?

C5. Reciprocity and Partnership Value

1. Beyond hiring graduates, what other forms of collaboration have you engaged in with [University Name]? (e.g., joint R&D, employee training, guest lectures, internships)

2. What value does your company derive from this partnership? Is it worth the time and resources you invest?

3. [Probe] What would make this partnership more valuable or sustainable from your company's perspective?

C6. Sustainability and Future Expectations

1. After a visit, does the university maintain regular contact? Who is your primary point of contact, and how frequently do you communicate?

2. Are there any mechanisms in place to hold either party accountable for commitments made during or after visits?

3. What are your expectations for the future of this partnership? What would you like to see more of , or less of?

C7. Closing Reflection

1. From an employer's perspective, what advice would you offer to private universities seeking to build more effective and mutually beneficial enterprise relationships?

2. Is there anything else you would like to share about your experience working with [University Name] or about university-industry collaboration in general?
